# Supplementary material for: Improved Somatic Mutagenesis in Zebrafish Using Transcription Activator-Like Effector Nucleases (TALENs)
Source: PLoS One. 2012 May 24;7(5):e37877. doi: 10.1371/journal.pone.0037877 (PMC3360007; doi:10.1371/journal.pone.0037877)
Supplement: Table S1 — PCR primers used to amplify genomic DNA in target regions to determine mutation rate. (XLSX) [file pone.0037877.s003.xlsx]

## Sheet: Sheet1
Gene	Nuclease	Forward Primer	Reverse Primer
Bmi1	TALEN	TTACAGAGGCGTAGACAAGCTG	GGCAGTATTTACTGGTCTCCAGGT
Ikzf1	TALEN	TCAGCCTGTCTGTCAAAGCGGTAA	GCATTAACATCTACTGAGTCACACCAC
Phf6(#1)	TALEN	TCCAACCTAGTGCTAGCAAGGTG	TGCAACAGACATTATACAACTACAAGC
Phf6(#2)	TALEN	GGGAGCTCTCTATGAAATCAGGAA	GAGCACAATAGTAATGGTACGTCCT
MyoD	TALEN	CGGGATCTGAAGGACTTTGTCT	TGGAAGCATCAGAGTCTCCACTGT
Jak3	TALEN	ACAGCAAAGAGTACTTTCCTTCC	CAACTAGAAGTCAAGTTATTATTTGTGGC
Ptenb	ZFN	AGAAGAGTGGTCTTGGGTCAG	TGAATTATCTTTGCTTCAAGCT
Rag2	ZFN	AGGCCTTGAATCCATAAGTCTG	GCCAGGAGTCCAACTGATTTC
Tp53	ZFN	TGCCAAATTCACAAGTGTCCTG	GAACTGTTTGGGATAGCCTAGT
Bmpr2a	ZFN	GTTATGGTGCCTTAAATGACAATG	GAGAACATTCAAACTCCACACAGAA
Jak3	ZFN	CCTCTTAATTCTACTTGCATATCA	TGGCATCAATGACAAGACTTAG
Grip1	ZFN	ACGCTCTGATTTGCACAGCTAAAAC	ATGATGAGCAATGATGCTTCTTTCA
Lmna	ZFN	CAACTGCAGGAACGGTAAGAAAGAA	TGCCTGCTCAAGCTTCTAATAATGG
Actinin	ZFN	TCATGCAACTGTGGGAGGAG	TTATGTTGCTCAAAAGCACTGGTA
Cdh15	ZFN	CCGAGTTTACTCAAAAAGAGTTCATT	TAACCACCGTCACACCTAAGC
MyoD	ZFN	TCCAGAACGGGATAGTAGTTATCC	TAGACTGTAGTTTTGAAACGTACGTT
Yap	ZFN	TGTATGGTTGCAGCCGACT	ACGAAAATACTACGCAGTGACACT
Ikzf1	ZFN	CAGCGTCAGTCTTTATCCTGC	CAGCCTGTAATATAAAAGTTGAGGC
Bmi1	ZFN	TAAATGCACCAAAATACATTGCC	TATTGCAAATGTCACATTCATAACTCT
Phf6	ZFN	TTTTGGGTCGATTTTCCCTT	ACCGGTCTCGCTGTGTCAT
Meis1	ZFN	TTCAATCCGATGGAATTTAAAAG	TTCACATTCTGGATGCGTCT
Ezh2	ZFN	CTCAGATGTTACACACACAAATGC	AAATCTGTGTTTTTGAAACTAAGTTGA
Fbxl4	ZFN	ACAATCTTGTGTGATATTTGTGTGG	AGGCACTCCTGCTAGGTTCC
Wnt16	ZFN	GCGCTGTCTTGTTTTAACTATCAA	AATGTGAGACATTGTATGCATACC
Bcl11b	ZFN	CATTAGCGCCAGCTCGAA	GGCTGATCTCCACTCTCACC
Lck	ZFN	GACAGAAATTCCATTAAAAATAAGCC	ACACACACAAACAACTCCGAAA
Tet2	ZFN	GGAGGGCAAAAGTGGGCT	CCAAAAGAGAAAGAAGCTCCG
Lef1	ZFN	GCGCGCTCTTGTTACCGT	GTAAGTCCTGAACAGCGGGA
Eya2	ZFN	CTGACTCATTTGTGATTCAGTTGA	TGAAGTTTGGTGTGTATCCCAG
Scl/Tal1	ZFN	AGCTCCTTTCCTCCACTCAC	TCTGCCTTGAGCTCCCTG
Lmo2	ZFN	TGCTCCCCTATTTATCAGGTG	AGCACATGTTTGCCTGTATTTG
